# Supplementary material for: Intercalation of p-Aminopyridine and p-Ethylenediamine Molecules into Orthorhombic In1.2Ga0.8S3 Single Crystals
Source: MDPI journal article supplement (doi:10.3390/ma16062368), 2023-03-15
Supplement: s1 [file s1]

# Supplemental data to “Intercalation of p-Aminopyridine and p-Ethylenediamine Molecules into Orthorhombic In<sub>1.2</sub>Ga<sub>0.8</sub>S<sub>3</sub> Single Crystals”

Aysel B. Rahimli <sup>1</sup>, Imamaddin R. Amiraslanov <sup>1,2,\*</sup>, Zakir A. Jahangirli <sup>1,2</sup>, Naila H. Aliyeva <sup>3</sup>, Pascal Boulet <sup>4</sup>, Marie-Christine Record <sup>5</sup> and Ziya S. Aliev <sup>2,\*</sup>

<sup>1</sup> Institute of Physics, Ministry of Science and Education of Azerbaijan, AZ1143 Baku, Azerbaijan

<sup>2</sup> Nanoresearch Laboratory, Baku State University, AZ1148 Baku, Azerbaijan

<sup>3</sup> Chemical Technologies Department, Faculty of Metallurgy and Materials Science, Azerbaijan Technical University, AZ1073 Baku, Azerbaijan

<sup>4</sup> CNRS MADIREL Laboratory, Faculty of Sciences, Aix-Marseille University, 13013 Marseille, France

<sup>5</sup> CNRS IM2NP Laboratory, Faculty of Sciences, Aix-Marseille University, 13013 Marseille, France

\* Correspondence: iamiraslan@gmail.com (I.R.A.); ziyasaliyev@gmail.com (Z.S.A.)

**Table S1.** Bond critical points (BCP) with the following properties: atom ends connected by the BCP, interatomic distance  $d$ , the ratio of the distances between the BCP and the atom ends  $d_1/d_2$ , angle  $\theta$  between the BCP and the atom ends (BCP being the apex), electron density Laplacian eigenvalues  $\lambda_i$  ( $i = 1, 2, 3$ ), ellipticity  $\lambda_1/\lambda_2 - 1$ , electron density Laplacian  $\nabla^2\rho$ , the electron density in  $\rho$  in Bohr<sup>-3</sup>, the kinetic energy density  $G$  in Ha.Bohr<sup>-3</sup>, the potential energy density  $V$  in Ha.Bohr<sup>-3</sup>, the bond degree  $H/\rho$  in Ha.e<sup>-1</sup>, potential to kinetic energy density ratio  $|V|/G$ , and the and kinetic energy per electron  $G/\rho$  in Ha.e<sup>-1</sup>.

| BCP | Ato<br>ms | d (Å) | $d_1/d_2$ | $\theta$ (°) | $\lambda_1 \times 10^2$ | $\lambda_2 \times 10^2$ | $\lambda_3 \times 10^2$ | $\lambda_1/\lambda_2 - 1 \times 10^2$ | $\nabla^2\rho \times 10^2$ | $\rho \times 10^2$ | $G \times 10^2$ | $V \times 10^2$ | $H/\rho$   | $V/G$      | $G/\rho$ |
|-----|-----------|-------|-----------|--------------|-------------------------|-------------------------|-------------------------|---------------------------------------|----------------------------|--------------------|-----------------|-----------------|------------|------------|----------|
| b1  | S-S       | 3.873 | 0.995     | 179.6<br>8   | -0.22<br>6              | -0.20<br>6              | 1.71                    | 9.42                                  | 1.28                       | 0.489              | 0.254           | -0.18<br>7      | 0.136      | -0.73<br>8 | 0.520    |
| b2  | S-S       | 3.589 | 0.995     | 178.7<br>1   | -0.46<br>8              | -0.43<br>0              | 3.00                    | 8.76                                  | 2.11                       | 0.820              | 0.447           | -0.36<br>7      | 0.097      | -0.82<br>2 | 0.545    |
| b3  | In-S      | 2.658 | 0.903     | 179.8<br>5   | -4.64<br>5              | -4.38                   | 16.3                    | 5.83                                  | 7.31                       | 5.17               | 3.28            | -4.73           | -0.28<br>1 | -0.14<br>4 | 0.634    |
| b4  | In-S      | 2.708 | 0.902     | 178.5<br>0   | -3.88<br>0              | -3.77                   | 15.2                    | 2.97                                  | 7.59                       | 4.53               | 2.92            | -3.94           | -0.22<br>6 | -1.35      | 0.644    |
| b5  | In-S      | 2.628 | 0.912     | 179.8<br>5   | -4.61<br>5              | -4.57                   | 17.4                    | 0.984                                 | 8.23                       | 5.17               | 3.43            | -481            | -0.26<br>6 | -1.40      | 0.664    |
| b6  | In-S      | 2.578 | 0.912     | 177.9<br>4   | -5.46<br>4              | -5.37                   | 19.3                    | 1.60                                  | 8.47                       | 5.88               | 3.96            | -5.81           | -0.31<br>4 | -1.47      | 0.674    |
| b7  | Ga-S      | 2.343 | 0.809     | 178.3<br>4   | -7.56<br>4              | -7.26                   | 21.6                    | 4.17                                  | 6.83                       | 7.52               | 4.98            | -8.25           | -0.43<br>6 | -1.66      | 0.663    |
| b8  | Ga-S      | 2.343 | 0.809     | 178.2<br>9   | -7.67<br>9              | -7.32                   | 22.1                    | 4.84                                  | 7.07                       | 7.61               | 5.11            | -8.44           | -0.43<br>9 | -1.65      | 0.670    |
| b9  | Ga-S      | 2.256 | 0.777     | 178.4<br>1   | -8.91<br>1              | -8.66                   | 27.0                    | 2.84                                  | 9.43                       | 8.77               | 6.54            | -10.7           | -0.47<br>7 | -1.64      | 0.746    |
